# Supplementary material
Source: publisher figshare collection journal article supplement (https://acs.figshare.com/ndownloader/files/4522882)
Supplement: Supplementary file 1 [file 4522882]

  
data_zhj2b 
  
_audit_creation_method            SHELXL-97 
_chemical_name_systematic 
; 
 ? 
; 
_chemical_name_common             ? 
_chemical_melting_point           ? 
_chemical_formula_moiety          ? 
_chemical_formula_sum 
 'C13 H20 N2 Si' 
_chemical_formula_weight          232.40 
  
loop_ 
 _atom_type_symbol 
 _atom_type_description 
 _atom_type_scat_dispersion_real 
 _atom_type_scat_dispersion_imag 
 _atom_type_scat_source 
 'C'  'C'   0.0033   0.0016 
 'International Tables Vol C Tables 4.2.6.8 and 6.1.1.4' 
 'H'  'H'   0.0000   0.0000 
 'International Tables Vol C Tables 4.2.6.8 and 6.1.1.4' 
 'N'  'N'   0.0061   0.0033 
 'International Tables Vol C Tables 4.2.6.8 and 6.1.1.4' 
 'Si'  'Si'   0.0817   0.0704 
 'International Tables Vol C Tables 4.2.6.8 and 6.1.1.4' 
  
_symmetry_cell_setting            orthorhombic 
_symmetry_space_group_name_H-M    Pna2(1) 
  
loop_ 
 _symmetry_equiv_pos_as_xyz 
 'x, y, z' 
 '-x, -y, z+1/2' 
 'x+1/2, -y+1/2, z' 
 '-x+1/2, y+1/2, z+1/2' 
  
_cell_length_a                    10.600(2) 
_cell_length_b                    14.995(3) 
_cell_length_c                    8.7526(18) 
_cell_angle_alpha                 90.00 
_cell_angle_beta                  90.00 
_cell_angle_gamma                 90.00 
_cell_volume                      1391.2(5) 
_cell_formula_units_Z             4 
_cell_measurement_temperature     293(2) 
_cell_measurement_reflns_used     9379 
_cell_measurement_theta_min       2.35 
_cell_measurement_theta_max       27.48 
  
_exptl_crystal_description        block 
_exptl_crystal_colour             colorless 
_exptl_crystal_size_max           0.40 
_exptl_crystal_size_mid           0.40 
_exptl_crystal_size_min           0.20 
_exptl_crystal_density_meas       ? 
_exptl_crystal_density_diffrn     1.110 
_exptl_crystal_density_method     'not measured' 
_exptl_crystal_F_000              504 
_exptl_absorpt_coefficient_mu     0.147 
_exptl_absorpt_correction_type    'Empirical' 
_exptl_absorpt_correction_T_min   0.9435 
_exptl_absorpt_correction_T_max   0.9712 
_exptl_absorpt_process_details 
; 
                                  HIGASHI, T. (1995). Abscor-Empirical 
                                  Absorption Correction based on Fourier 
                                  Series Approximation. 
                                  Rigaku Corporation,Tokyo,Japan. 
; 
  
_diffrn_ambient_temperature       293(2) 
_diffrn_radiation_wavelength      0.71073 
_diffrn_radiation_type            MoK\a 
_diffrn_radiation_source          'fine-focus sealed tube' 
_diffrn_radiation_monochromator   graphite 
_diffrn_measurement_device_type   'Rigaku RAXIS RAPID IP' 
_diffrn_measurement_method        \W 
_diffrn_detector_area_resol_mean  10.00 
_diffrn_standards_number          0 
_diffrn_standards_interval_count  0 
_diffrn_standards_interval_time   0 
_diffrn_standards_decay_%         0 
_diffrn_reflns_number             9379 
_diffrn_reflns_av_R_equivalents   0.0771 
_diffrn_reflns_av_sigmaI/netI     0.1097 
_diffrn_reflns_limit_h_min        -13 
_diffrn_reflns_limit_h_max        13 
_diffrn_reflns_limit_k_min        -19 
_diffrn_reflns_limit_k_max        19 
_diffrn_reflns_limit_l_min        -11 
_diffrn_reflns_limit_l_max        11 
_diffrn_reflns_theta_min          2.35 
_diffrn_reflns_theta_max          27.48 
_reflns_number_total              1686 
_reflns_number_gt                 663 
_reflns_threshold_expression      >2sigma(I) 
  
_computing_data_collection        'Rapid-AUTO (Rigaku,2000)' 
_computing_cell_refinement        'Rapid-AUTO' 
_computing_data_reduction         'CrystalStructure (Rigaku/MSC,2000)' 
_computing_structure_solution     'SHELXS-97,(Sheldrick,1997)' 
_computing_structure_refinement   'SHELXL-97,(Sheldrick,1997)' 
_computing_molecular_graphics     'Siemens SHELXTL V4.2,(Sheldrick,1990)' 
_computing_publication_material   'SHELXL-97,(Sheldrick,1997)' 
  
_refine_special_details 
; 
 Refinement of F^2^ against ALL reflections.  The weighted R-factor wR and 
 goodness of fit S are based on F^2^, conventional R-factors R are based 
 on F, with F set to zero for negative F^2^. The threshold expression of 
 F^2^ > 2sigma(F^2^) is used only for calculating R-factors(gt) etc. and is 
 not relevant to the choice of reflections for refinement.  R-factors based 
 on F^2^ are statistically about twice as large as those based on F, and R- 
 factors based on ALL data will be even larger. 
; 
  
_refine_ls_structure_factor_coef  Fsqd 
_refine_ls_matrix_type            full 
_refine_ls_weighting_scheme       calc 
_refine_ls_weighting_details 
 'calc w=1/[\s^2^(Fo^2^)+(0.0700P)^2^+0.0000P] where P=(Fo^2^+2Fc^2^)/3' 
_atom_sites_solution_primary      direct 
_atom_sites_solution_secondary    difmap 
_atom_sites_solution_hydrogens    geom 
_refine_ls_hydrogen_treatment     none 
_refine_ls_extinction_method      SHELXL 
_refine_ls_extinction_coef        0.0035(19) 
_refine_ls_extinction_expression 
 'Fc^*^=kFc[1+0.001xFc^2^\l^3^/sin(2\q)]^-1/4^' 
_refine_ls_abs_structure_details 
 'Flack H D (1983), Acta Cryst. A39, 876-881' 
_refine_ls_abs_structure_Flack    0.2(5) 
_refine_ls_number_reflns          1686 
_refine_ls_number_parameters      149 
_refine_ls_number_restraints      2 
_refine_ls_R_factor_all           0.1428 
_refine_ls_R_factor_gt            0.0752 
_refine_ls_wR_factor_ref          0.1954 
_refine_ls_wR_factor_gt           0.1755 
_refine_ls_goodness_of_fit_ref    1.021 
_refine_ls_restrained_S_all       1.021 
_refine_ls_shift/su_max           0.008 
_refine_ls_shift/su_mean          0.001 
  
loop_ 
 _atom_site_label 
 _atom_site_type_symbol 
 _atom_site_fract_x 
 _atom_site_fract_y 
 _atom_site_fract_z 
 _atom_site_U_iso_or_equiv 
 _atom_site_adp_type 
 _atom_site_occupancy 
 _atom_site_symmetry_multiplicity 
 _atom_site_calc_flag 
 _atom_site_refinement_flags 
 _atom_site_disorder_assembly 
 _atom_site_disorder_group 
C1 C -0.1863(7) 1.1062(5) 0.413(2) 0.115(3) Uani 1 1 d . . . 
C2 C -0.0685(5) 1.0594(4) 0.420(3) 0.116(4) Uani 1 1 d . . . 
C3 C 0.0457(5) 1.0991(4) 0.4137(17) 0.0676(19) Uani 1 1 d . . . 
C4 C 0.1485(5) 1.0339(4) 0.4098(18) 0.079(2) Uani 1 1 d . . . 
C5 C 0.0919(6) 0.9547(4) 0.410(4) 0.201(8) Uani 1 1 d . . . 
C6 C 0.1431(7) 0.8638(5) 0.3370(15) 0.102(3) Uani 1 1 d . . . 
H6A H 0.1224 0.8597 0.2293 0.123 Uiso 1 1 calc R . . 
H6B H 0.2337 0.8582 0.3495 0.123 Uiso 1 1 calc R . . 
C7 C 0.0807(7) 0.8014(4) 0.419(2) 0.120(4) Uani 1 1 d . . . 
H7A H 0.1124 0.8045 0.5233 0.144 Uiso 1 1 calc R . . 
H7B H 0.1044 0.7435 0.3794 0.144 Uiso 1 1 calc R . . 
C8 C -0.0654(7) 0.8038(4) 0.428(2) 0.095(3) Uani 1 1 d . . . 
H8A H -0.1009 0.7792 0.3354 0.114 Uiso 1 1 calc R . . 
H8B H -0.0939 0.7677 0.5136 0.114 Uiso 1 1 calc R . . 
C9 C -0.1102(6) 0.8995(4) 0.4490(8) 0.103(4) Uani 1 1 d D . . 
H9A H -0.2009 0.9017 0.4352 0.124 Uiso 1 1 calc R . . 
H9B H -0.0918 0.9185 0.5526 0.124 Uiso 1 1 calc R . . 
C10 C -0.0496(6) 0.9631(4) 0.3396(8) 0.128(6) Uani 1 1 d D . . 
C11 C 0.4271(6) 0.9648(5) 0.418(2) 0.155(5) Uani 1 1 d . . . 
H11A H 0.4022 0.9245 0.3384 0.232 Uiso 1 1 calc R . . 
H11B H 0.4215 0.9351 0.5151 0.232 Uiso 1 1 calc R . . 
H11C H 0.5125 0.9837 0.4011 0.232 Uiso 1 1 calc R . . 
C12 C 0.3543(11) 1.1348(8) 0.2528(11) 0.101(4) Uani 1 1 d . . . 
H12A H 0.4434 1.1351 0.2333 0.151 Uiso 1 1 calc R . . 
H12B H 0.3264 1.1945 0.2738 0.151 Uiso 1 1 calc R . . 
H12C H 0.3106 1.1123 0.1649 0.151 Uiso 1 1 calc R . . 
C13 C 0.3599(14) 1.1288(8) 0.5978(16) 0.128(5) Uani 1 1 d . . . 
H13A H 0.4426 1.1544 0.5885 0.193 Uiso 1 1 calc R . . 
H13B H 0.3577 1.0895 0.6843 0.193 Uiso 1 1 calc R . . 
H13C H 0.2990 1.1755 0.6115 0.193 Uiso 1 1 calc R . . 
N1 N -0.2801(6) 1.1410(4) 0.411(3) 0.172(5) Uani 1 1 d . . . 
N2 N 0.0625(5) 1.1876(3) 0.4336(16) 0.089(2) Uani 1 1 d . . . 
H2A H -0.0014 1.2215 0.4509 0.106 Uiso 1 1 calc R . . 
H2B H 0.1370 1.2101 0.4289 0.106 Uiso 1 1 calc R . . 
Si1 Si 0.32092(14) 1.06363(10) 0.4176(8) 0.0656(6) Uani 1 1 d . . . 
  
loop_ 
 _atom_site_aniso_label 
 _atom_site_aniso_U_11 
 _atom_site_aniso_U_22 
 _atom_site_aniso_U_33 
 _atom_site_aniso_U_23 
 _atom_site_aniso_U_13 
 _atom_site_aniso_U_12 
C1 0.057(4) 0.060(4) 0.229(10) -0.014(13) 0.005(11) 0.000(4) 
C2 0.036(3) 0.044(3) 0.269(11) -0.010(10) 0.031(10) 0.002(3) 
C3 0.050(3) 0.046(3) 0.107(5) 0.025(7) -0.020(7) -0.003(3) 
C4 0.043(3) 0.043(3) 0.150(7) 0.025(8) 0.022(8) 0.008(2) 
C5 0.047(3) 0.038(4) 0.52(2) -0.031(16) -0.023(17) 0.009(3) 
C6 0.074(4) 0.050(4) 0.182(9) -0.003(6) 0.002(6) 0.013(4) 
C7 0.106(6) 0.036(3) 0.217(11) 0.010(9) 0.041(14) 0.011(4) 
C8 0.095(5) 0.044(3) 0.146(8) 0.002(8) -0.025(10) -0.010(3) 
C9 0.061(4) 0.063(4) 0.186(11) 0.013(8) 0.019(7) -0.010(4) 
C10 0.043(3) 0.043(3) 0.298(17) 0.017(7) 0.000(6) 0.002(3) 
C11 0.060(4) 0.076(5) 0.330(16) 0.008(15) -0.058(12) 0.023(4) 
C12 0.087(7) 0.162(10) 0.054(6) 0.027(7) 0.006(6) -0.026(9) 
C13 0.102(9) 0.100(8) 0.183(13) -0.008(9) -0.020(10) -0.032(9) 
N1 0.053(3) 0.084(4) 0.380(14) 0.038(13) -0.024(13) 0.021(3) 
N2 0.051(3) 0.041(3) 0.173(7) -0.013(6) 0.015(7) 0.005(2) 
Si1 0.0434(8) 0.0561(10) 0.0974(14) -0.006(2) 0.0041(19) 0.0005(7) 
  
_geom_special_details 
; 
 All esds (except the esd in the dihedral angle between two l.s. planes) 
 are estimated using the full covariance matrix.  The cell esds are taken 
 into account individually in the estimation of esds in distances, angles 
 and torsion angles; correlations between esds in cell parameters are only 
 used when they are defined by crystal symmetry.  An approximate (isotropic) 
 treatment of cell esds is used for estimating esds involving l.s. planes. 
; 
  
loop_ 
 _geom_bond_atom_site_label_1 
 _geom_bond_atom_site_label_2 
 _geom_bond_distance 
 _geom_bond_site_symmetry_2 
 _geom_bond_publ_flag 
C1 N1 1.123(7) . ? 
C1 C2 1.434(9) . ? 
C2 C3 1.351(7) . ? 
C2 C10 1.617(13) . ? 
C3 N2 1.350(8) . ? 
C3 C4 1.464(7) . ? 
C4 C5 1.330(8) . ? 
C4 Si1 1.883(5) . ? 
C5 C6 1.600(15) . ? 
C5 C10 1.625(15) . ? 
C6 C7 1.354(13) . ? 
C6 H6A 0.9700 . ? 
C6 H6B 0.9700 . ? 
C7 C8 1.550(9) . ? 
C7 H7A 0.9700 . ? 
C7 H7B 0.9700 . ? 
C8 C9 1.523(9) . ? 
C8 H8A 0.9700 . ? 
C8 H8B 0.9700 . ? 
C9 C10 1.496(2) . ? 
C9 H9A 0.9700 . ? 
C9 H9B 0.9700 . ? 
C11 Si1 1.862(6) . ? 
C11 H11A 0.9600 . ? 
C11 H11B 0.9600 . ? 
C11 H11C 0.9600 . ? 
C12 Si1 1.829(9) . ? 
C12 H12A 0.9600 . ? 
C12 H12B 0.9600 . ? 
C12 H12C 0.9600 . ? 
C13 Si1 1.900(12) . ? 
C13 H13A 0.9600 . ? 
C13 H13B 0.9600 . ? 
C13 H13C 0.9600 . ? 
N2 H2A 0.8600 . ? 
N2 H2B 0.8600 . ? 
  
loop_ 
 _geom_angle_atom_site_label_1 
 _geom_angle_atom_site_label_2 
 _geom_angle_atom_site_label_3 
 _geom_angle 
 _geom_angle_site_symmetry_1 
 _geom_angle_site_symmetry_3 
 _geom_angle_publ_flag 
N1 C1 C2 178.0(17) . . ? 
C3 C2 C1 124.3(5) . . ? 
C3 C2 C10 105.4(7) . . ? 
C1 C2 C10 121.9(10) . . ? 
N2 C3 C2 123.1(6) . . ? 
N2 C3 C4 124.2(5) . . ? 
C2 C3 C4 111.9(5) . . ? 
C5 C4 C3 105.1(5) . . ? 
C5 C4 Si1 130.5(5) . . ? 
C3 C4 Si1 124.3(4) . . ? 
C4 C5 C6 127.4(12) . . ? 
C4 C5 C10 110.3(9) . . ? 
C6 C5 C10 103.2(12) . . ? 
C7 C6 C5 102.1(10) . . ? 
C7 C6 H6A 111.3 . . ? 
C5 C6 H6A 111.4 . . ? 
C7 C6 H6B 111.3 . . ? 
C5 C6 H6B 111.3 . . ? 
H6A C6 H6B 109.2 . . ? 
C6 C7 C8 119.9(10) . . ? 
C6 C7 H7A 107.3 . . ? 
C8 C7 H7A 107.3 . . ? 
C6 C7 H7B 107.3 . . ? 
C8 C7 H7B 107.3 . . ? 
H7A C7 H7B 106.9 . . ? 
C9 C8 C7 109.8(5) . . ? 
C9 C8 H8A 109.7 . . ? 
C7 C8 H8A 109.7 . . ? 
C9 C8 H8B 109.7 . . ? 
C7 C8 H8B 109.7 . . ? 
H8A C8 H8B 108.2 . . ? 
C10 C9 C8 113.0(8) . . ? 
C10 C9 H9A 109.0 . . ? 
C8 C9 H9A 109.0 . . ? 
C10 C9 H9B 109.0 . . ? 
C8 C9 H9B 109.0 . . ? 
H9A C9 H9B 107.8 . . ? 
C9 C10 C2 103.8(8) . . ? 
C9 C10 C5 96.0(9) . . ? 
C2 C10 C5 91.2(8) . . ? 
Si1 C11 H11A 109.5 . . ? 
Si1 C11 H11B 109.5 . . ? 
H11A C11 H11B 109.5 . . ? 
Si1 C11 H11C 109.5 . . ? 
H11A C11 H11C 109.5 . . ? 
H11B C11 H11C 109.5 . . ? 
Si1 C12 H12A 109.5 . . ? 
Si1 C12 H12B 109.5 . . ? 
H12A C12 H12B 109.5 . . ? 
Si1 C12 H12C 109.5 . . ? 
H12A C12 H12C 109.5 . . ? 
H12B C12 H12C 109.5 . . ? 
Si1 C13 H13A 109.5 . . ? 
Si1 C13 H13B 109.5 . . ? 
H13A C13 H13B 109.5 . . ? 
Si1 C13 H13C 109.5 . . ? 
H13A C13 H13C 109.5 . . ? 
H13B C13 H13C 109.5 . . ? 
C3 N2 H2A 120.0 . . ? 
C3 N2 H2B 120.0 . . ? 
H2A N2 H2B 120.0 . . ? 
C12 Si1 C11 110.5(7) . . ? 
C12 Si1 C4 107.3(6) . . ? 
C11 Si1 C4 113.5(3) . . ? 
C12 Si1 C13 108.2(4) . . ? 
C11 Si1 C13 106.1(7) . . ? 
C4 Si1 C13 111.3(6) . . ? 
  
_diffrn_measured_fraction_theta_max    0.993 
_diffrn_reflns_theta_full              27.48 
_diffrn_measured_fraction_theta_full   0.993 
_refine_diff_density_max    0.324 
_refine_diff_density_min   -0.280 
_refine_diff_density_rms    0.063 
  
